# Supplementary material
Source: publisher figshare collection journal article supplement (https://frontiersin.figshare.com/ndownloader/files/25193123)
Supplement: Supplementary file 1 [file 25193123]

CODE	Anuraeopsis fissa Gosse, 1851	Asplanchna sieboldii (Leydig, 1854)	Beauchampiella eudactylota (Gosse, 1886)	Brachionus bidentatus Anderson, 1889	Brachionus calyciflorus Pallas, 1766	Brachionus caudatus Barrois & Daday, 1894	Brachionus falcatus Zacharias, 1898	Brachionus havanaensis Rousselet, 1911	Brachionus quadridentatus Hermann, 1783	Brachionus quadridentatus Hermann, 1783	Cephalodella exigua (Gosse, 1886)	Cephalodella forficula (Ehrenberg, 1830)	Cephalodella gibba (Ehrenberg, 1830)	Cephalodella intuta Myers, 1924	Cephalodella misgurnus Wulfert, 1937	Cephalodella sp.	Cephalodella stenroosi Wulfert, 1937	Cephalodella ventripes (Dixon-Nuttall, 1901)	Colloteca sp.	Colurella obtusa (Gosse, 1886)	Colurella uncinata (M�ller, 1773)	Dicranophoroides claviger (Hauer, 1965)	Dicranophorus grandis (Ehrenberg, 1832)	Dipleuchlanis propatula (Gosse, 1886)	Encentrum sp.	Eosphera sp.	Euchlanis incisa Carlin, 1939	Euchlanis meneta Myers, 1930	Euchlanis sp.	Filinia terminalis (Plate, 1886)	Gastropus hyptopus (Ehrenberg, 1838)	Harringia rousseleti de Beauchamp, 1912	Hexarthra fennica (Levander, 1892)	Keratella americana Carlin, 1943	Keratella serrulata (Ehrenberg, 1838)	Lecane aeganea Harring, 1914	Lecane bulla (Gosse, 1851)	Lecane candida Harring & Myers, 1926	Lecane clara (Bryce, 1892)	Lecane closterocerca (Schmarda, 1859)	Lecane cornuta (M�ller, 1786)	Lecane crepida Harring, 1914	Lecane curvicornis (Murray, 1913)	Lecane decipiens (Murray, 1913)	Lecane elegans Harring, 1914	Lecane elsa Hauer, 1931	Lecane flexilis (Gosse, 1886)	Lecane furcata (Murray, 1913)	Lecane hamata (Stokes, 1896)
1CRN01	0	0	0	0	0	0	0	0	0	0	0	0	0	0	0	0	0	0	3	2	15	0	0	0	0	0	2	2	0	0	0	0	0	0	0	0	4	0	0	29	2	0	0	0	0	0	0	0	10
1CRN02	0	0	0	0	0	0	0	0	0	0	0	0	0	0	0	0	0	0	327	0	0	0	0	0	0	0	0	0	0	0	0	0	0	1	0	0	0	0	0	0	1	0	0	0	0	0	1	0	0
1CRN03	0	2	0	0	0	0	0	0	0	0	0	0	0	0	0	0	0	0	0	0	2	0	0	0	0	0	0	0	2	13	0	0	0	0	0	0	6	0	0	2	0	0	2	0	0	2	0	0	0
1CRN05	0	1	1	0	0	0	0	0	1	0	2	0	0	27	0	0	0	0	0	0	4	0	0	0	0	0	0	0	1	0	0	0	0	0	0	0	1	0	0	2	2	0	0	0	0	0	1	0	1
1CRN06	0	0	0	0	0	0	0	0	0	0	0	0	2	0	0	0	0	0	2	4	0	0	0	0	0	0	0	0	0	0	0	0	0	0	0	0	4	0	0	59	0	0	0	0	0	0	0	21	10
1CRN07	22	3	0	0	0	0	0	0	17	0	0	0	0	0	0	0	0	0	0	0	0	0	0	0	0	0	0	0	0	3	0	0	249	0	0	0	0	0	0	0	0	0	0	0	0	19	0	0	0
1CRN08	0	0	0	0	0	0	0	0	0	0	2	4	2	0	0	0	0	0	0	0	8	0	0	2	0	0	0	0	0	0	0	0	0	0	0	0	0	0	0	4	0	0	0	2	0	2	0	0	8
1CRN09	0	4	0	0	0	0	0	0	3	0	2	0	2	0	0	0	0	0	119	0	4	0	0	2	0	0	0	0	2	0	0	0	0	0	0	0	5	0	0	3	2	0	0	0	0	0	4	0	2
1CRN10	0	0	0	0	0	0	0	0	0	0	0	0	1	0	0	0	0	0	0	0	16	1	0	0	4	0	0	2	0	0	0	0	0	0	0	0	4	0	0	4	4	0	0	0	0	0	0	0	2
1CRN11	80	0	0	0	0	0	0	0	46	0	0	0	1	0	0	0	0	0	0	0	1	1	0	0	0	0	0	1	0	0	0	0	0	0	0	0	128	0	0	24	0	0	0	0	0	0	0	0	12
1CRN12	156	0	0	0	0	0	0	0	0	0	0	0	16	0	4	0	0	0	0	0	0	0	0	0	0	0	0	0	0	0	0	0	0	0	0	0	8	0	0	4	0	0	0	0	0	0	0	0	4
1CRN13	0	0	0	0	0	0	0	0	0	0	0	0	0	0	4	0	0	0	0	0	0	0	0	0	0	0	0	0	0	0	0	0	0	0	0	0	0	0	0	0	0	0	8	0	0	4	0	0	0
1CRN14	1409	0	0	0	0	0	0	0	5	0	0	0	11	0	0	0	0	0	0	0	56	0	0	0	0	0	0	0	5	0	0	0	0	0	0	0	83	0	0	75	19	0	0	0	0	18	0	0	10
1CRN15	12	0	0	0	0	0	0	0	8	0	0	0	0	0	100	4	0	0	0	0	0	1	0	0	0	0	0	0	0	24	0	0	0	0	0	0	16	0	0	0	0	0	0	0	0	1	0	0	4
1CRN16	48	0	0	0	0	0	0	0	0	0	0	0	0	0	0	0	0	0	0	44	0	0	0	0	0	0	0	0	0	0	0	0	0	0	0	0	8	4	0	0	0	0	0	0	0	0	0	0	0
1CRN17	28	0	2	0	0	0	0	0	5	0	0	0	0	0	32	0	0	0	0	8	0	0	0	0	0	4	0	0	0	0	0	0	0	0	0	0	44	0	0	12	0	0	0	0	0	2	0	0	9
1CRN18	0	0	0	0	0	0	0	0	0	0	0	0	0	0	0	0	0	0	0	0	0	0	0	4	0	0	0	0	4	0	0	0	0	0	0	0	4	0	0	0	0	0	0	0	0	0	0	0	0
1CRN19	0	0	0	0	0	0	0	0	0	0	0	0	0	0	0	0	0	0	0	0	0	0	0	0	0	0	0	0	0	0	0	0	0	0	0	0	4	0	0	0	0	0	0	0	0	0	4	0	8
1CRN20	0	0	0	0	0	0	0	0	0	0	0	0	0	0	0	0	0	0	0	0	0	0	0	0	0	0	0	0	0	0	0	0	0	0	0	0	0	0	0	7	7	7	7	0	0	7	0	0	7
1CRN21	0	0	0	0	0	0	0	0	0	0	0	0	0	0	0	0	0	0	0	0	0	0	0	0	0	0	0	0	0	4	0	0	0	0	0	0	0	0	0	0	0	7	0	0	0	7	0	0	4
1CRN22	0	0	0	0	0	0	2	0	0	0	0	0	0	0	0	0	0	0	0	0	0	0	0	0	0	0	0	0	0	0	0	0	0	0	0	0	6	0	0	7	4	8	2	0	0	0	0	4	0
1CRN23	2	0	0	0	0	0	0	0	0	0	0	0	0	0	0	0	0	0	0	0	0	0	0	0	0	0	0	0	0	4	0	0	0	0	0	0	8	0	0	5	0	7	0	0	0	0	0	0	2
1CRN24	0	0	0	0	6	2	4	0	0	0	0	0	0	0	0	0	0	0	0	0	0	0	0	0	0	0	0	0	0	9	0	0	0	0	0	0	6	0	0	3	2	6	0	0	0	0	0	0	6
1CRN25	0	0	0	0	0	0	0	0	0	0	0	0	0	0	0	0	0	0	0	0	0	0	0	0	0	0	0	0	0	0	0	0	0	0	0	0	15	0	0	1	1	0	4	6	1	13	1	1	0
1CRN26	0	0	1	0	0	0	0	0	3	0	0	0	0	0	1	0	0	0	1	0	2	0	0	0	1	0	1	1	0	0	0	0	0	0	0	0	2	5	0	1	3	0	1	0	0	2	0	3	1
1CRN27	0	0	0	0	0	0	0	0	0	0	0	0	0	0	0	0	0	0	0	0	0	0	0	0	0	0	0	0	0	0	0	0	0	0	0	0	28	0	0	0	0	0	4	0	0	0	0	0	0
1CRN29	0	0	0	0	0	0	0	0	0	0	0	0	5	0	0	0	0	0	0	0	0	0	0	33	0	0	0	0	0	0	0	0	0	0	0	0	439	0	0	0	24	0	47	5	0	336	0	0	84
1CRN30	0	0	3	0	0	0	0	0	0	0	0	0	0	3	0	0	0	0	5	0	19	0	0	7	0	0	3	0	0	0	0	0	0	0	3	0	59	0	0	3	5	0	55	0	0	3	0	0	0
2CRN01	0	0	0	0	0	0	0	0	0	0	0	0	0	0	0	0	0	0	0	0	0	0	0	8	0	0	1	4	0	0	0	0	0	0	0	0	11	0	0	0	7	0	3	0	0	1	0	0	1
2CRN02	0	0	0	0	0	0	0	0	0	0	0	0	0	0	0	0	0	3	0	0	0	0	0	2	0	0	0	0	0	0	0	0	0	0	1	0	6	0	0	0	5	0	0	0	0	0	0	0	0
2CRN03	0	0	0	0	0	0	0	0	0	0	0	0	0	0	0	0	0	0	0	0	0	0	0	0	0	0	0	0	0	0	0	0	0	0	0	0	2	0	0	0	1	0	0	0	0	0	0	0	0
2CRN05	0	0	0	0	0	0	0	0	0	0	0	0	0	0	0	0	0	0	0	0	0	0	0	1	0	0	0	0	0	0	0	0	0	0	0	0	1	0	0	0	0	0	0	0	0	0	0	0	1
2CRN06	0	0	1	0	0	0	0	0	0	0	0	0	0	0	0	0	0	0	0	0	0	0	0	0	0	0	0	0	0	0	0	0	0	0	0	0	3	0	0	0	1	0	1	0	0	0	0	0	0
2CRN07	10	0	0	0	0	0	0	0	0	0	0	0	0	0	0	0	1	0	0	0	0	0	0	0	0	0	0	0	0	0	0	1	0	0	0	0	1	0	0	0	0	0	0	0	0	0	0	0	1
2CRN08	0	0	0	0	0	0	0	0	0	0	0	0	3	0	0	0	0	0	0	0	0	0	0	2	0	0	0	0	0	0	0	0	0	0	0	0	0	0	0	0	0	0	0	0	0	0	0	0	1
2CRN09	0	0	1	0	0	0	0	0	0	0	0	0	0	0	0	0	1	0	0	0	1	0	0	1	0	0	0	0	0	0	0	0	0	0	0	0	2	0	0	0	0	0	0	0	0	0	0	0	3
2CRN10	0	0	0	0	0	0	0	0	0	0	0	0	0	0	0	0	0	0	0	0	0	0	0	0	0	0	0	0	0	0	0	0	0	0	0	0	1	0	0	0	0	0	1	0	0	0	0	0	0
2CRN11	0	0	0	0	0	0	0	0	0	0	0	0	0	0	0	0	0	0	0	0	0	0	0	0	0	0	1	0	0	0	0	0	0	0	0	0	0	0	0	0	0	0	0	0	0	0	0	0	0
2CRN12	24	0	0	0	0	12	0	0	7	0	0	0	16	0	0	0	0	0	0	0	0	0	1	0	0	0	0	0	0	0	0	0	0	0	0	0	4	0	0	1	0	0	2	0	0	0	0	0	0
2CRN13	0	0	0	0	0	0	0	0	0	0	0	0	0	0	0	0	0	0	0	0	0	0	0	0	0	0	0	0	0	0	0	0	0	0	0	0	1	0	0	0	0	0	2	0	0	0	0	0	0
2CRN14	23	0	0	0	0	0	0	0	2	0	0	0	0	0	0	0	0	0	0	1	0	0	0	0	0	0	0	0	0	1	0	0	0	0	0	0	9	0	0	0	0	0	23	0	0	0	0	0	2
2CRN15	0	0	0	0	0	0	0	0	0	0	0	0	3	0	0	0	0	0	0	1	0	0	0	0	0	0	0	0	0	0	0	0	0	0	0	1	18	0	0	0	2	0	0	0	0	0	0	0	13
2CRN16	0	0	0	0	0	0	0	0	0	0	0	0	2	0	0	0	0	0	0	0	0	0	0	0	0	0	0	0	0	0	0	0	0	0	0	0	5	0	0	0	0	0	0	0	0	0	0	1	0
2CRN17	0	0	0	0	0	0	0	0	0	0	0	0	0	0	0	0	0	0	0	0	0	0	0	0	0	0	0	0	0	0	0	0	0	0	0	0	3	0	0	0	1	1	2	0	0	0	0	0	3
2CRN18	0	0	0	0	0	0	0	0	2	0	0	0	0	0	0	0	0	0	0	0	0	0	0	0	0	0	0	0	0	0	0	0	0	0	0	0	40	0	0	0	2	0	0	0	0	0	0	0	2
2CRN19	0	0	0	0	0	0	0	0	0	0	0	0	0	0	0	0	0	0	0	0	0	0	0	1	0	0	0	0	0	0	0	0	0	0	0	0	2	0	0	0	4	0	0	0	0	0	0	0	1
2CRN20	0	0	1	0	0	0	0	0	2	0	0	0	27	0	0	0	1	0	0	0	0	0	0	0	0	0	0	0	0	0	0	0	0	0	0	0	76	0	0	1	3	3	57	0	0	1	0	0	1
2CRN21	0	0	0	0	3	5	25	9	1	0	0	0	0	0	0	0	0	0	0	0	0	1	0	1	0	0	0	0	0	38	0	0	0	0	0	0	1	0	0	1	2	7	1	0	0	1	0	0	3
2CRN22	0	0	0	0	0	10	12	0	0	0	0	0	0	0	0	0	0	0	0	0	0	0	0	0	0	0	0	0	0	16	0	0	0	0	0	0	2	0	0	5	0	6	0	0	0	1	0	0	2
2CRN23	0	0	0	0	0	0	0	0	0	0	0	0	0	0	0	0	0	0	0	0	0	0	0	0	0	0	0	0	0	0	0	0	0	0	0	0	64	0	0	1	27	32	0	0	0	0	0	0	71
2CRN24	1	1	0	0	13	1	2	0	1	0	0	0	1	0	0	0	0	0	0	0	0	0	0	1	0	0	0	0	0	75	0	0	0	0	0	0	1	0	0	0	1	0	1	0	0	0	0	0	3
2CRN25	0	0	0	0	0	0	0	0	0	0	0	0	0	0	0	0	0	0	0	0	2	0	0	7	0	0	15	2	0	0	0	0	0	0	0	0	33	0	0	0	6	0	2	0	0	0	0	0	3
2CRN26	0	0	1	0	0	0	0	0	0	0	0	0	0	0	0	0	0	1	0	0	0	0	0	0	0	0	0	0	0	0	0	0	0	0	0	0	0	0	0	0	0	0	0	0	0	0	0	0	0
2CRN27	0	0	0	0	0	0	0	0	0	0	0	0	1	0	0	0	0	0	0	1	0	0	0	0	0	0	0	6	0	0	0	0	0	0	6	0	1	0	0	0	0	2	0	0	0	0	0	0	1
2CRN29	0	0	0	0	0	0	0	0	0	0	0	0	0	0	0	0	0	0	0	0	14	2	0	11	0	0	0	0	0	0	1	0	0	0	0	0	31	0	0	0	0	2	0	0	0	0	0	0	1
2CRN30	0	0	0	0	0	0	0	0	1	0	0	0	0	0	0	0	0	0	0	0	0	0	0	2	0	0	1	4	0	0	0	0	0	0	0	0	28	0	0	0	2	0	1	0	0	0	0	1	0
3CRN02	0	0	0	0	0	0	0	0	0	0	0	0	0	0	0	0	0	0	0	0	0	0	0	0	0	0	0	0	0	0	0	0	0	0	0	0	0	0	0	0	21	0	0	0	0	0	0	0	0
3CRN03	3	0	5	0	0	0	0	0	0	0	0	0	0	0	0	0	0	0	0	0	0	0	0	1	0	0	0	0	0	1	0	0	0	0	0	0	2	0	0	0	2	0	0	0	0	0	0	0	0
3CRN05	0	0	4	0	0	0	0	0	1	0	0	0	0	0	0	0	0	0	0	0	0	0	0	0	0	0	1	0	0	0	0	0	0	0	0	0	1	0	0	0	2	0	0	0	0	0	0	0	0
3CRN06	0	0	0	0	0	0	0	68	0	0	0	0	0	0	0	0	0	0	0	0	0	0	0	0	0	0	0	0	0	0	0	0	0	0	211	0	0	0	0	0	1	0	0	0	0	0	0	0	1
3CRN07	0	0	0	0	0	0	0	0	10	0	0	0	0	0	0	0	0	0	0	0	0	0	0	0	0	0	0	0	0	0	0	0	1	0	0	0	1	0	0	0	0	0	0	0	0	0	0	0	0
3CRN08	0	0	0	0	0	0	0	0	0	0	0	0	0	0	0	0	0	0	0	0	0	0	0	0	0	0	0	0	0	0	0	0	0	0	0	0	0	0	0	0	4	0	0	0	0	0	0	0	1
3CRN09	0	0	0	0	0	0	0	0	0	0	0	0	0	0	0	0	0	0	0	0	0	0	0	0	0	0	0	0	0	0	0	0	0	0	0	0	0	0	0	0	2	0	0	0	0	0	0	0	1
3CRN10	0	0	2	0	0	0	0	1	0	0	0	0	0	0	0	0	0	0	0	0	0	0	0	3	0	0	0	0	0	0	0	0	0	0	0	0	5	0	0	0	1	0	1	0	0	0	0	0	0
3CRN11	0	0	0	0	0	0	0	0	0	0	0	0	0	0	0	0	0	0	0	0	0	0	0	0	0	0	0	0	0	0	0	0	0	0	0	0	2	0	0	0	3	0	0	0	0	0	0	0	0
3CRN12	0	0	0	0	0	0	0	0	0	1	0	0	0	0	0	0	0	0	0	0	0	0	0	0	0	0	0	0	0	0	0	0	0	0	0	0	7	0	0	0	0	0	0	0	0	0	0	0	0
3CRN13	0	0	0	0	0	0	0	0	0	0	0	0	0	0	0	0	0	0	0	0	0	0	0	0	0	0	0	0	0	0	0	0	0	0	0	0	0	0	0	0	0	0	0	0	0	0	0	0	0
3CRN14	0	0	0	0	0	0	0	0	0	0	0	0	0	0	0	0	0	0	0	0	0	0	0	0	0	0	0	0	0	0	0	0	0	0	0	0	0	0	0	0	5	0	0	0	0	0	0	0	0
3CRN15	0	0	3	0	0	0	0	0	0	23	0	0	0	0	0	0	0	0	0	1	0	0	0	0	0	0	0	0	0	0	0	0	0	0	0	0	29	0	0	0	3	0	0	0	0	0	0	0	0
3CRN16	0	0	0	0	0	0	0	0	0	580	0	0	0	0	0	0	0	0	0	0	0	0	0	1	0	0	0	0	0	0	0	0	0	0	0	0	5	0	0	0	0	0	0	0	0	0	0	0	0
3CRN17	0	0	1	0	0	0	0	0	0	0	0	0	0	0	0	0	0	0	0	0	0	0	0	0	0	0	0	0	0	0	0	0	0	0	0	0	6	0	0	1	5	0	0	0	0	0	0	0	0
3CRN18	0	0	0	0	0	0	0	0	0	330	0	0	0	0	0	0	0	0	0	0	0	0	0	0	0	0	0	0	0	0	0	0	0	0	0	0	0	0	0	0	0	0	0	0	0	0	0	0	0
3CRN19	0	0	0	0	0	0	0	0	0	0	0	0	0	0	0	0	0	0	0	0	0	0	0	0	0	0	0	0	0	0	0	0	0	0	0	0	0	0	0	0	0	0	0	0	0	0	0	0	0
3CRN20	0	0	0	10	0	221	1	3	0	0	0	0	0	0	0	0	0	0	0	0	0	0	0	0	0	0	0	0	0	0	0	0	0	0	0	0	0	0	0	0	1	1	0	0	0	0	0	0	0
3CRN21	0	0	0	18	0	102	1	91	0	0	0	0	0	0	0	0	0	0	0	2	0	0	0	0	0	0	0	0	0	10	0	0	0	0	344	0	5	0	0	1	2	1	0	0	0	1	0	0	1
3CRN22	0	0	0	0	0	2	0	75	0	0	0	0	0	0	0	0	0	0	0	0	0	0	0	0	0	0	0	0	0	0	0	0	0	143	1	0	2	0	0	1	1	0	0	0	0	0	0	0	0
3CRN23	0	0	0	1	0	32	0	0	2	0	0	0	0	0	0	0	0	0	0	0	0	0	0	0	0	0	0	0	0	1	0	0	0	0	0	0	41	0	0	1	4	1	0	0	0	0	0	0	0
3CRN24	0	0	0	0	0	3	1	0	5	0	0	0	0	0	0	0	0	0	0	0	0	1	0	0	0	0	0	0	0	10	0	0	0	0	0	0	1	0	0	0	0	0	0	0	0	0	0	0	0
3CRN26	0	0	0	0	0	0	0	0	1	0	0	0	0	0	0	0	0	0	0	0	0	0	0	0	0	0	0	0	0	0	0	0	0	43	0	0	1	0	0	0	4	0	0	0	0	0	0	0	4
3CRN27	0	0	0	0	0	0	0	0	0	0	0	0	0	0	0	0	0	0	0	0	0	0	0	0	0	0	0	0	0	0	0	0	0	22	0	0	0	0	1	0	0	0	0	0	0	0	0	0	0
3CRN29	0	0	4	0	0	0	0	0	1	0	0	0	0	0	0	0	0	0	0	0	1	0	0	3	0	0	2	0	0	0	0	0	0	0	0	0	3	0	0	0	6	0	1	0	0	1	0	0	6
3CRN30	0	0	0	0	0	0	0	0	0	0	0	0	2	0	0	0	0	0	0	1	0	0	0	1	0	0	0	0	0	0	0	0	0	0	0	0	0	0	0	0	2	0	0	0	0	0	0	0	0
[truncated: 52 more columns]
